# Supplementary material
Source: PubMed Central journal article supplement (PMC7212052)

Supplementary figure 1

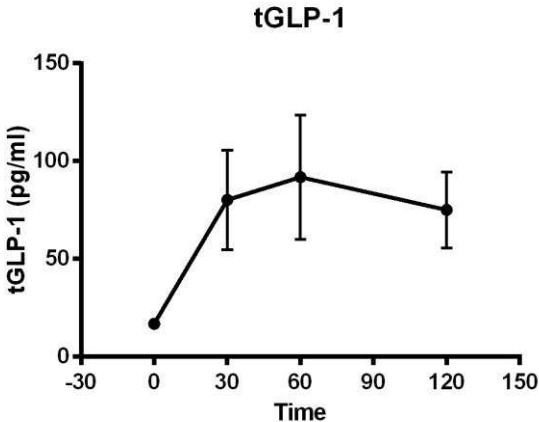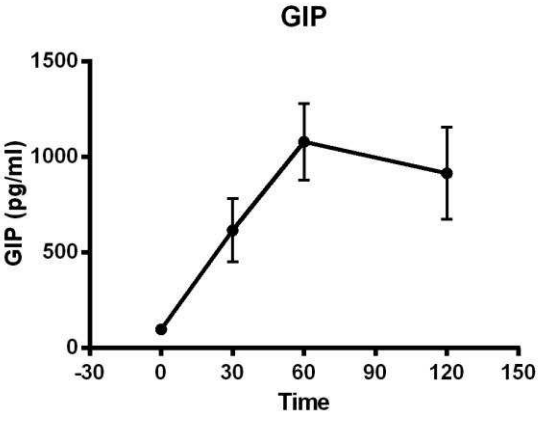

Supplement: EMS86323-supplement-Supplementary_figure_1.pdf [file EMS86323-supplement-Supplementary_figure_1.pdf]
